# Supplementary material for: Geologic and geomorphic controls on rockfall hazard: how well do past rockfalls predict future distributions?
Source: Copernicus journal article supplement (doi:10.5194/nhess-2019-178), 2019-06-11
Supplement: Supplementary file 1 [file nhess-2019-178-supplement.pdf]

## **Supplementary Information**

### **3 Methods**

#### **Model Scenarios**

RAMMS\_1 (bare-earth CES model) utilized 7 individual release lines (CES-1 through CES-7). The release lines were drawn at the base of each field-identified CES detachment site and an individual drop height ( $z$ ) was estimated. The drop heights for the CES detachment sites ranged from 3-15 m. To help constrain the range of potential boulder shapes released from each area, the detachment sites were recorded as occurring within volcanic breccia (VB) or coherent lava (CL) basalt. The total number of release points for RAMMS\_1 was 56. The total number of simulated rocks was 1072 and represents the number of source points multiplied by the number of simulated rocks and number of random orientations (for boulder starting positions within source rock) (see S9-S15).

The RAMMS\_2 (slope vegetation/prehistoric model) and RAMMS\_3 (bare-earth modern hazard) model scenarios utilized the same 26 separate release lines (total combined line length= $\sim$ 3,895 m). Because we are uncertain from exactly which sections of the source cliffs the pre-CES boulders were released, the entire source cliff was delineated. RAMMS\_2 release lines were used for the RAMMS\_3 to provide a conservative (worst-case) scenario. The total number of release points for the RAMMS\_2 and RAMMS\_3 model scenarios was 567. The total number of simulated rocks was 22680 for each model scenario. An average drop height of 10 m was utilized above the release lines to insure realistic boulder kinetic energies, with the exception of the southernmost source outcrop (CES-7) where a release height of 3 m was inputted to reflect the smaller height of the source rock (see S18-S23).

#### **Boulder Shape**

Ten (10) individual boulders were created for RAMMS\_1, while twenty (20) boulders were created for the RAMMS\_2 and RAMMS\_3 model scenarios. The following percentages were assigned for boulder shapes at Purau: 70% for equant, 15% for flat, 15% for long. For individual CES detachments (i.e. RAMMS\_1) that were field-identified as occurring entirely within the coherent lava (CL) lithology, the shape distribution was modified to reflect the higher percentage of long and flat boulder morphologies and the following percentages were assigned: 40% for equant, 30% for flat, 30% for long.

The boulder sizes were chosen from a statistical analysis of the Purau pre-CES and CES boulder inventory, which includes volume estimated from axis proportions. We assumed a power-law distribution for the frequency-volume of simulated boulders, consistent with the mapped pre-CES and CES boulders at Purau. The simulated rockfall boulders range in size from  $1.0 \text{ m}^3$  to  $50 \text{ m}^3$ . The following percentages were attributed to each boulder size range within RAMMS: 85% for  $1\text{-}10 \text{ m}^3$ ; 15% for  $10\text{-}100 \text{ m}^3$ . Boulders sizes  $>100 \text{ m}^3$  are rare and were not included in the simulation. The relative proportions of volcanic breccia ( $2500 \text{ kg/m}^3$ ) and coherent lava ( $3000 \text{ kg/m}^3$ ) densities were applied.

## **5 Discussion**

### **Interpretations of strong ground motion data**

By assuming the shear velocity ( $V_s$ ) of stratified basaltic lava and breccia at Rapaki and Purau sites to be  $\sim 2500 \text{ m/s}$  (Christensen et al., 1980), we estimate  $f_n = \sim 5 - 6 \text{ Hz}$  ( $f_n = V_s/\lambda$ ). This  $V_s$  is likely an over estimate for the given sites as  $2500 \text{ m/s}$  corresponds to an effective confining pressure of 200 bar. On the other hand, if we use an average  $V_s$  value of  $800 \text{ m/s}$  applicable to Rapaki sites (e.g. Mackey and Quigley, 2014), we obtain  $f_n = \sim 2 \text{ Hz}$ . Thus, it is safe to assume that  $f_n$  of these sites is less than 5 Hz.

## **Supplementary Data**

Tables S1-S8 are found in the following Dryad repository - [doi:10.5061/dryad.9km1t86](https://doi.org/10.5061/dryad.9km1t86)

**Table S1.** Rapaki Pre-CES Rockfall Data

**Table S2.** Rapaki CES Rockfall Data

**Table S3.** Purau Pre-CES Rockfall Data

**Table S4.** Purau CES Rockfall Data

**Table S5.** Rapaki Pre-CES Runout Data

**Table S6.** Rapaki CES Runout Data

**Table S7.** Purau Pre-CES Domain Runout Data

**Table S8.** Purau CES Domain Runout Data

**S9-S23.** Rockfall simulation scenario logfiles for RAMMS\_1, RAMMS\_2, and RAMMS\_3.

**S24.** Data fits for Purau runout distance.

**S9. Rockfall simulation scenario logfile for RAMMS\_1 CES\_1**

\*\*\*\*\*  
RAMMS::ROCKFALL - Simulation Scenario Logfile

Version 1.6.61

Scenario Name: CES\_1\_2019  
Scenario Folder: C:\RAMMS\PurauRockfall\output\CES\_1\_2019\

Simulation Started: Fri Mar 08 10:53:49 2019  
Simulation Finished: Fri Mar 08 10:53:57 2019

Simulation Time (min): 0.1

Simulation Settings:  
Nr\_Source\_Points: 3  
Nr\_Simulated\_Rocks: 2  
Nr\_Random\_Orientations: 3  
Nr\_Z-Offset\_Iterations: 1  
(Nr\_Simulations\_Per\_Source\_Point: 6)  
Total\_Nr\_Simulations: 18

Simulation Results:

(Min/Mean/Max Values)  
Jumpheights (m): 0.49 / 1.59 / 3.73  
Velocities (m/s): 0.06 / 8.32 / 22.32  
Kin. Energies (kJ): 0.01 / 964.74 / 7298.13  
Rot. Velocities (rot s-1): 0.00 / 0.93 / 4.24  
Average Slope (Degrees): 28.58 / 38.34 / 41.51

\*\*\*\*\*  
Input Settings:

General:  
Time Step (s): 0.010  
Dump Step (s): 0.020  
DEM File: PurauRockfall\PurauRockfall.xyz  
DEM Resolution (m): 4.00  
Calculation Domain: .\

Friction:  
Overall Type: Medium  
(Values have changed!)

Additional Friction Areas:  
JWB\_Volcanic\_Rock\_2019.shp: Extra Hard  
JWB\_Loess\_Volcanic\_Colluvium\_2019.shp: Medium Hard  
JWB\_Valley\_Terrain\_2019.shp: Extra Soft

Release:  
Type: Line  
Line Shapefile: PurauRockfall\CES\_1\_F.shp  
Z-Offset: 15.00 m

Rock:  
Rock Density (kg/m3): 2700.00

Block Volumes (m3):

- Min = 1.12
- Mean = 8.01
- Max = 14.91

Rock Forms:

Real\_Long\_1.48\_1.1m3(3000).pts

Real\_Long\_2.0\_14.9m3(2500).pts

**S10. Rockfall simulation scenario logfile for RAMMS\_1 CES\_2**

\*\*\*\*\*  
RAMMS::ROCKFALL - Simulation Scenario Logfile

Version 1.6.61

Scenario Name: CES\_2\_2019

Scenario Folder: C:\RAMMS\PurauRockfall\output\CES\_2\_2019\

Simulation Started: Fri Mar 08 10:42:47 2019

Simulation Finished: Fri Mar 08 10:43:37 2019

Simulation Time (min): 0.8

Simulation Settings:

Nr\_Source\_Points: 6

Nr\_Simulated\_Rocks: 10

Nr\_Random\_Orientations: 3

Nr\_Z-Offset\_Iterations: 1

(Nr\_Simulations\_Per\_Source\_Point: 30)

Total\_Nr\_Simulations: 180

Simulation Results:

(Min/Mean/Max Values)

Jumpheights (m): 0.53 / 1.19 / 5.69

Velocities (m/s): 0.00 / 6.26 / 20.43

Kin. Energies (kJ): 0.00 / 374.61 / 14629.47

Rot. Velocities (rot s-1): 0.00 / 0.85 / 3.45

Average Slope (Degrees): 26.34 / 35.07 / 90.00

\*\*\*\*\*  
Input Settings:

General:

Time Step (s): 0.010

Dump Step (s): 0.020

DEM File: PurauRockfall\PurauRockfall.xyz

DEM Resolution (m): 4.00

Calculation Domain: .\

Friction:

Overall Type: Medium

(Values have changed!)

Additional Friction Areas:

JWB\_Volcanic\_Rock\_2019.shp: Extra Hard

JWB\_Loess\_Volcanic\_Colluvium\_2019.shp: Medium Hard

JWB\_Valley\_Terrain\_2019.shp: Extra Soft

Release:

Type: Line

Line Shapefile: PurauRockfall\CES\_2\_F.shp

Z-Offset: 15.00 m

Rock:

Rock Density (kg/m3): 2700.00

Block Volumes (m3):

- Min = 1.13
- Mean = 8.84
- Max = 50.43

Rock Forms:

Real\_Equant\_1.25\_2.3m3.pts  
Real\_Equant\_1.2\_1.1m3.pts  
Real\_Equant\_1.2\_1.3m3.pts  
Real\_Equant\_1.2\_3.6m3.pts  
Real\_Equant\_1.4\_1.7m3.pts  
Real\_Equant\_1.4\_1.9m3.pts  
Real\_Equant\_1.4\_2.0m3.pts  
Real\_Flat\_1.77\_50.4m3.pts  
Real\_Flat\_1.77\_6.0m3.pts  
Real\_Long\_2.0\_17.8m3.pts

**S11. Rockfall simulation scenario logfile for RAMMS\_1 CES\_3**

\*\*\*\*\*  
RAMMS::ROCKFALL - Simulation Scenario Logfile

Version 1.6.61

Scenario Name: CES\_3\_2019

Scenario Folder: C:\RAMMS\PurauRockfall\output\CES\_3\_2019\

Simulation Started: Fri Mar 08 10:32:28 2019

Simulation Finished: Fri Mar 08 10:33:25 2019

Simulation Time (min): 0.9

Simulation Settings:

Nr\_Source\_Points: 7

Nr\_Simulated\_Rocks: 10

Nr\_Random\_Orientations: 3

Nr\_Z-Offset\_Iterations: 1

(Nr\_Simulations\_Per\_Source\_Point: 30)

Total\_Nr\_Simulations: 210

Simulation Results:

(Min/Mean/Max Values)

Jumpheights (m): 0.52 / 1.31 / 5.48

Velocities (m/s): 0.01 / 7.78 / 25.36

Kin. Energies (kJ): 0.00 / 491.78 / 18487.71

Rot. Velocities (rot s-1): 0.00 / 0.94 / 3.93

Average Slope (Degrees): 30.05 / 35.85 / 51.42

\*\*\*\*\*  
Input Settings:

General:

Time Step (s): 0.010

Dump Step (s): 0.020

DEM File: PurauRockfall\PurauRockfall.xyz

DEM Resolution (m): 4.00

Calculation Domain: .\

Friction:

Overall Type: Medium

(Values have changed!)

Additional Friction Areas:

JWB\_Volcanic\_Rock\_2019.shp: Extra Hard

JWB\_Loess\_Volcanic\_Colluvium\_2019.shp: Medium Hard

JWB\_Valley\_Terrain\_2019.shp: Extra Soft

Release:

Type: Line

Line Shapefile: PurauRockfall\CES\_3\_F.shp

Z-Offset: 10.00 m

Rock:

Rock Density (kg/m3): 2700.00

Block Volumes (m3):

- Min = 1.13
- Mean = 8.84
- Max = 50.43

Rock Forms:

Real\_Equant\_1.25\_2.3m3.pts  
Real\_Equant\_1.2\_1.1m3.pts  
Real\_Equant\_1.2\_1.3m3.pts  
Real\_Equant\_1.2\_3.6m3.pts  
Real\_Equant\_1.4\_1.7m3.pts  
Real\_Equant\_1.4\_1.9m3.pts  
Real\_Equant\_1.4\_2.0m3.pts  
Real\_Flat\_1.77\_50.4m3.pts  
Real\_Flat\_1.77\_6.0m3.pts  
Real\_Long\_2.0\_17.8m3.pts

**S12. Rockfall simulation scenario logfile for RAMMS\_1 CES\_4**

\*\*\*\*\*  
RAMMS::ROCKFALL - Simulation Scenario Logfile

Version 1.6.61

Scenario Name: CES\_4\_2019

Scenario Folder: C:\RAMMS\PurauRockfall\output\CES\_4\_2019\

Simulation Started: Fri Mar 08 10:26:31 2019

Simulation Finished: Fri Mar 08 10:27:05 2019

Simulation Time (min): 0.6

Simulation Settings:

Nr\_Source\_Points: 4

Nr\_Simulated\_Rocks: 10

Nr\_Random\_Orientations: 3

Nr\_Z-Offset\_Iterations: 1

(Nr\_Simulations\_Per\_Source\_Point: 30)

Total\_Nr\_Simulations: 120

Simulation Results:

(Min/Mean/Max Values)

Jumpheights (m): 0.53 / 1.48 / 7.33

Velocities (m/s): 0.00 / 11.88 / 29.83

Kin. Energies (kJ): 0.00 / 747.07 / 11670.40

Rot. Velocities (rot s-1): 0.00 / 1.68 / 5.59

Average Slope (Degrees): 26.33 / 33.91 / 65.35

\*\*\*\*\*  
Input Settings:

General:

Time Step (s): 0.010

Dump Step (s): 0.020

DEM File: PurauRockfall\PurauRockfall.xyz

DEM Resolution (m): 4.00

Calculation Domain: .\

Friction:

Overall Type: Medium

(Values have changed!)

Additional Friction Areas:

JWB\_Volcanic\_Rock\_2019.shp: Extra Hard

JWB\_Loess\_Volcanic\_Colluvium\_2019.shp: Medium Hard

JWB\_Valley\_Terrain\_2019.shp: Extra Soft

Release:

Type: Line

Line Shapefile: PurauRockfall\CES\_4\_F.shp

Z-Offset: 5.00 m

Rock:

Rock Density (kg/m3): 2700.00

Block Volumes (m3):

- Min = 1.13
- Mean = 8.84
- Max = 50.43

Rock Forms:

Real\_Equant\_1.25\_2.3m3.pts  
Real\_Equant\_1.2\_1.1m3.pts  
Real\_Equant\_1.2\_1.3m3.pts  
Real\_Equant\_1.2\_3.6m3.pts  
Real\_Equant\_1.4\_1.7m3.pts  
Real\_Equant\_1.4\_1.9m3.pts  
Real\_Equant\_1.4\_2.0m3.pts  
Real\_Flat\_1.77\_50.4m3.pts  
Real\_Flat\_1.77\_6.0m3.pts  
Real\_Long\_2.0\_17.8m3.pts

**S13. Rockfall simulation scenario logfile for RAMMS\_1 CES\_5**

\*\*\*\*\*  
RAMMS::ROCKFALL - Simulation Scenario Logfile

Version 1.6.61

Scenario Name: CES\_5\_2019

Scenario Folder: C:\RAMMS\PurauRockfall\output\CES\_5\_2019\

Simulation Started: Fri Mar 08 10:20:32 2019

Simulation Finished: Fri Mar 08 10:21:13 2019

Simulation Time (min): 0.7

Simulation Settings:

Nr\_Source\_Points: 5

Nr\_Simulated\_Rocks: 10

Nr\_Random\_Orientations: 3

Nr\_Z-Offset\_Iterations: 1

(Nr\_Simulations\_Per\_Source\_Point: 30)

Total\_Nr\_Simulations: 150

Simulation Results:

(Min/Mean/Max Values)

Jumpheights (m): 0.45 / 1.49 / 8.00

Velocities (m/s): 0.00 / 12.69 / 26.55

Kin. Energies (kJ): 0.00 / 486.66 / 2497.54

Rot. Velocities (rot s-1): 0.00 / 1.98 / 5.32

Average Slope (Degrees): 28.80 / 38.39 / 90.00

\*\*\*\*\*  
Input Settings:

General:

Time Step (s): 0.010

Dump Step (s): 0.020

DEM File: PurauRockfall\PurauRockfall.xyz

DEM Resolution (m): 4.00

Calculation Domain: .\

Friction:

Overall Type: Medium

(Values have changed!)

Additional Friction Areas:

JWB\_Volcanic\_Rock\_2019.shp: Extra Hard

JWB\_Loess\_Volcanic\_Colluvium\_2019.shp: Medium Hard

JWB\_Valley\_Terrain\_2019.shp: Extra Soft

Release:

Type: Line

Line Shapefile: PurauRockfall\CES\_5\_F.shp

Z-Offset: 5.00 m

Rock:

Rock Density (kg/m3): 2700.00

Block Volumes (m3):

- Min = 1.02
- Mean = 1.77
- Max = 2.92

Rock Forms:

Real\_Equant\_1.25\_1.5m3(3000).pts  
Real\_Equant\_1.2\_1.0m3(3000).pts  
Real\_Equant\_1.4\_1.3m3(3000).pts  
Real\_Equant\_1.4\_2.2m3(3000).pts  
Real\_Flat\_1.77\_1.2m3(3000).pts  
Real\_Flat\_1.8\_1.6m3(3000).pts  
Real\_Flat\_2.35\_2.5m3(3000).pts  
Real\_Long\_1.48\_1.9m3(3000).pts  
Real\_Long\_2.0\_1.4m3(3000).pts  
Real\_Long\_2.0\_2.9m3(3000).pts

**S14. Rockfall simulation scenario logfile for RAMMS\_1 CES\_6**

\*\*\*\*\*  
RAMMS::ROCKFALL - Simulation Scenario Logfile

Version 1.6.61

Scenario Name: CES\_6\_2019  
Scenario Folder: C:\RAMMS\PurauRockfall\output\CES\_6\_2019\

Simulation Started: Fri Mar 08 10:13:17 2019  
Simulation Finished: Fri Mar 08 10:15:00 2019

Simulation Time (min): 1.7

Simulation Settings:  
Nr\_Source\_Points: 13  
Nr\_Simulated\_Rocks: 10  
Nr\_Random\_Orientations: 3  
Nr\_Z-Offset\_Iterations: 1  
(Nr\_Simulations\_Per\_Source\_Point: 30)  
Total\_Nr\_Simulations: 390

Simulation Results:

(Min/Mean/Max Values)  
Jumpheights (m): 0.45 / 2.58 / 16.02  
Velocities (m/s): 0.01 / 18.19 / 40.26  
Kin. Energies (kJ): 0.00 / 3274.93 / 95261.15  
Rot. Velocities (rot s-1): 0.00 / 2.54 / 7.61  
Average Slope (Degrees): 28.34 / 35.17 / 80.14

\*\*\*\*\*  
Input Settings:

General:  
Time Step (s): 0.010  
Dump Step (s): 0.020  
DEM File: PurauRockfall\PurauRockfall.xyz  
DEM Resolution (m): 4.00  
Calculation Domain: .\

Friction:  
Overall Type: Medium  
(Values have changed!)

Additional Friction Areas:  
JWB\_Volcanic\_Rock\_2019.shp: Extra Hard  
JWB\_Loess\_Volcanic\_Colluvium\_2019.shp: Medium Hard  
JWB\_Valley\_Terrain\_2019.shp: Extra Soft

Release:  
Type: Line  
Line Shapefile: PurauRockfall\CES\_6\_F.shp  
Z-Offset: 10.00 m

Rock:  
Rock Density (kg/m3): 2700.00

Block Volumes (m3):

- Min = 1.13
- Mean = 8.84
- Max = 50.43

Rock Forms:

Real\_Equant\_1.25\_2.3m3.pts  
Real\_Equant\_1.2\_1.1m3.pts  
Real\_Equant\_1.2\_1.3m3.pts  
Real\_Equant\_1.2\_3.6m3.pts  
Real\_Equant\_1.4\_1.7m3.pts  
Real\_Equant\_1.4\_1.9m3.pts  
Real\_Equant\_1.4\_2.0m3.pts  
Real\_Flat\_1.77\_50.4m3.pts  
Real\_Flat\_1.77\_6.0m3.pts  
Real\_Long\_2.0\_17.8m3.pts

**S15. Rockfall simulation scenario logfile for RAMMS\_1 CES\_7**

\*\*\*\*\*  
RAMMS::ROCKFALL - Simulation Scenario Logfile

Version 1.6.61

Scenario Name: CES\_7\_2019

Scenario Folder: C:\RAMMS\PurauRockfall\output\CES\_7\_2019\

Simulation Started: Fri Mar 08 09:57:18 2019

Simulation Finished: Fri Mar 08 09:58:59 2019

Simulation Time (min): 1.7

Simulation Settings:

Nr\_Source\_Points: 13

Nr\_Simulated\_Rocks: 10

Nr\_Random\_Orientations: 3

Nr\_Z-Offset\_Iterations: 1

(Nr\_Simulations\_Per\_Source\_Point: 30)

Total\_Nr\_Simulations: 390

Simulation Results:

(Min/Mean/Max Values)

Jumpheights (m): 0.52 / 1.10 / 3.65

Velocities (m/s): 0.00 / 8.16 / 20.55

Kin. Energies (kJ): 0.00 / 292.18 / 3110.81

Rot. Velocities (rot s-1): 0.00 / 1.16 / 3.91

Average Slope (Degrees): 16.58 / 24.30 / 90.00

\*\*\*\*\*  
Input Settings:

General:

Time Step (s): 0.010

Dump Step (s): 0.020

DEM File: PurauRockfall\PurauRockfall.xyz

DEM Resolution (m): 4.00

Calculation Domain: .\

Friction:

Overall Type: Medium

(Values have changed!)

Additional Friction Areas:

JWB\_Volcanic\_Rock\_2019.shp: Extra Hard

JWB\_Loess\_Volcanic\_Colluvium\_2019.shp: Medium Hard

JWB\_Valley\_Terrain\_2019.shp: Extra Soft

Release:

Type: Line

Line Shapefile: PurauRockfall\CES\_7\_RevisedFinal.shp

Z-Offset: 3.00 m

Rock:

Rock Density (kg/m3): 2700.00

Block Volumes (m3):

- Min = 1.13
- Mean = 8.84
- Max = 50.43

Rock Forms:

Real\_Equant\_1.25\_2.3m3.pts  
Real\_Equant\_1.2\_1.1m3.pts  
Real\_Equant\_1.2\_1.3m3.pts  
Real\_Equant\_1.2\_3.6m3.pts  
Real\_Equant\_1.4\_1.7m3.pts  
Real\_Equant\_1.4\_1.9m3.pts  
Real\_Equant\_1.4\_2.0m3.pts  
Real\_Flat\_1.77\_50.4m3.pts  
Real\_Flat\_1.77\_6.0m3.pts  
Real\_Long\_2.0\_17.8m3.pts

**S16. Rockfall simulation scenario logfile for CES\_7\_CL\_only**

\*\*\*\*\*  
RAMMS::ROCKFALL - Simulation Scenario Logfile

Version 1.6.60

Scenario Name: CES\_7\_CL\_Only  
Scenario Folder: C:\RAMMS\PurauRockfall\output\CES\_7\_CL\_Only\

Simulation Started: Mon Nov 13 12:40:26 2017  
Simulation Finished: Mon Nov 13 12:41:43 2017

Simulation Time (min): 1.3

Simulation Settings:  
Nr\_Source\_Points: 18  
Nr\_Simulated\_Rocks: 8  
Nr\_Random\_Orientations: 2  
Nr\_Z-Offset\_Iterations: 1  
(Nr\_Simulations\_Per\_Source\_Point: 16)  
Total\_Nr\_Simulations: 288

Simulation Results:

(Min/Mean/Max Values)  
Jumpheights (m): 0.36 / 0.77 / 3.12  
Velocities (m/s): 0.00 / 5.88 / 18.99  
Kin. Energies (kJ): 0.00 / 80.04 / 603.95  
Rot. Velocities (rot s-1): 0.00 / 0.99 / 4.12  
Average Slope (Degrees): 22.30 / 38.28 / 90.00

\*\*\*\*\*  
Input Settings:

General:  
Time Step (s): 0.010  
Dump Step (s): 0.020  
DEM File: PurauRockfall\PurauRockfall.xyz  
DEM Resolution (m): 4.00  
Calculation Domain: .\

Friction:  
Overall Type: Medium  
(Values have changed!)

Additional Friction Areas:  
Terrain\_LoessandVolcanicColluvium\_Final.shp: Medium Hard  
Terrain\_VolcanicRock\_Final.shp: Extra Hard

Release:  
Type: Line  
Line Shapefile: PurauRockfall\CES\_7\_F.shp  
Z-Offset: 3.00 m

Rock:  
Rock Density (kg/m3): 2700.00  
Block Volumes (m3):

- Min = 0.97
- Mean = 1.00
- Max = 1.02

Rock Forms:

Real\_Flat\_1.6\_1.0m3.pts  
Real\_Flat\_1.77\_1.0m3.pts  
Real\_Flat\_1.8\_1.0m3.pts  
Real\_Flat\_2.35\_1.0m3.pts  
Real\_Long\_1.2\_1.0m3.pts  
Real\_Long\_1.48\_1.0m3.pts  
Real\_Long\_1.5\_1.0m3.pts  
Real\_Long\_2.0\_1.0m3.pts

**S17. Rockfall simulation scenario logfile for CES\_7\_VB\_only**

\*\*\*\*\*  
RAMMS::ROCKFALL - Simulation Scenario Logfile

Version 1.6.60

Scenario Name: CES\_7\_VB\_Only  
Scenario Folder: C:\RAMMS\PurauRockfall\output\CES\_7\_VB\_Only\

Simulation Started: Mon Nov 13 12:16:38 2017  
Simulation Finished: Mon Nov 13 12:17:47 2017

Simulation Time (min): 1.2

Simulation Settings:  
Nr\_Source\_Points: 18  
Nr\_Simulated\_Rocks: 3  
Nr\_Random\_Orientations: 5  
Nr\_Z-Offset\_Iterations: 1  
(Nr\_Simulations\_Per\_Source\_Point: 15)  
Total\_Nr\_Simulations: 270

Simulation Results:

(Min/Mean/Max Values)  
Jumpheights (m): 0.44 / 0.90 / 3.32  
Velocities (m/s): 0.01 / 8.50 / 20.07  
Kin. Energies (kJ): 0.00 / 164.95 / 707.00  
Rot. Velocities (rot s-1): 0.00 / 1.48 / 4.23  
Average Slope (Degrees): 20.83 / 23.39 / 87.99

\*\*\*\*\*  
Input Settings:

General:  
Time Step (s): 0.010  
Dump Step (s): 0.020  
DEM File: PurauRockfall\PurauRockfall.xyz  
DEM Resolution (m): 4.00  
Calculation Domain: .\

Friction:  
Overall Type: Medium  
(Values have changed!)

Additional Friction Areas:  
Terrain\_LoessandVolcanicColluvium\_Final.shp: Medium Hard  
Terrain\_VolcanicRock\_Final.shp: Extra Hard

Release:  
Type: Line  
Line Shapefile: PurauRockfall\CES\_7\_F.shp  
Z-Offset: 3.00 m

Rock:  
Rock Density (kg/m3): 3000.00

Block Volumes (m3):

- Min = 1.01
- Mean = 1.01
- Max = 1.02

Rock Forms:

Real\_Equant\_1.25\_1.0m3.pts

Real\_Equant\_1.2\_1.0m3.pts

Real\_Equant\_1.4\_1.0m3.pts

**S18. Rockfall simulation scenario logfile for RAMMS\_3\_ModernHazard\_No South**

\*\*\*\*\*

RAMMS::ROCKFALL - Simulation Scenario Logfile

Version 1.6.61

Scenario Name: ModernHazard\_2019\_NoSouth

Scenario Folder: C:\RAMMS\PurauRockfall\output\ModernHazard\_2019\_NoSouth\

Simulation Started: Mon Mar 11 17:19:27 2019

Simulation Finished: Mon Mar 11 19:44:56 2019

Simulation Time (min): 145.5

Simulation Settings:

Nr\_Source\_Points: 570

Nr\_Simulated\_Rocks: 20

Nr\_Random\_Orientations: 3

Nr\_Z-Offset\_Iterations: 1

(Nr\_Simulations\_Per\_Source\_Point: 60)

Total\_Nr\_Simulations: 34200

Simulation Results:

(Min/Mean/Max Values)

Jumpheights (m): 0.45 / 1.76 / 19.13

Velocities (m/s): 0.00 / 13.05 / 42.61

Kin. Energies (kJ): 0.00 / 1438.97 / 109452.22

Rot. Velocities (rot s-1): 0.00 / 1.84 / 8.01

Average Slope (Degrees): 20.90 / 33.48 / 90.00

\*\*\*\*\*

Input Settings:

General:

Time Step (s): 0.010

Dump Step (s): 0.020

DEM File: PurauRockfall\PurauRockfall.xyz

DEM Resolution (m): 4.00

Calculation Domain: .\

Friction:

Overall Type: Medium

(Values have changed!)

Additional Friction Areas:

JWB\_Volcanic\_Rock\_2019.shp: Extra Hard

JWB\_Loess\_Volcanic\_Colluvium\_2019.shp: Medium Hard

JWB\_Valley\_Terrain\_2019.shp: Extra Soft

Release:

Type: Line

Line Shapefile: PurauRockfall\ModernHazard\_ReleaseLines\_Final.shp

Z-Offset: 10.00 m

Rock:

Rock Density (kg/m3): 2700.00

Block Volumes (m3):

- Min = 1.13
- Mean = 6.27
- Max = 50.43

Rock Forms:

Real\_Equant\_1.25\_1.5m3.pts  
Real\_Equant\_1.25\_14.7m3.pts  
Real\_Equant\_1.25\_2.3m3.pts  
Real\_Equant\_1.2\_1.1m3.pts  
Real\_Equant\_1.2\_1.2m3(3000).pts  
Real\_Equant\_1.2\_1.3m3.pts  
Real\_Equant\_1.2\_1.4m3(3000).pts  
Real\_Equant\_1.2\_1.8m3.pts  
Real\_Equant\_1.2\_3.6m3.pts  
Real\_Equant\_1.4\_1.6m3(3000).pts  
Real\_Equant\_1.4\_1.7m3.pts  
Real\_Equant\_1.4\_1.9m3.pts  
Real\_Equant\_1.4\_2.0m3.pts  
Real\_Equant\_1.4\_4.8m3.pts  
Real\_Flat\_1.77\_50.4m3.pts  
Real\_Flat\_1.77\_6.0m3.pts  
Real\_Flat\_1.8\_2.6m3(3000).pts  
Real\_Long\_1.2\_2.9m3(3000).pts  
Real\_Long\_2.0\_17.8m3.pts  
Real\_Long\_2.0\_4.4m3(3000).pts

**S19. Rockfall simulation scenario logfile for RAMMS\_3\_ModernHazard\_South**

\*\*\*\*\*

RAMMS::ROCKFALL - Simulation Scenario Logfile

Version 1.6.61

Scenario Name: ModernHazard\_2019\_South

Scenario Folder: C:\RAMMS\PurauRockfall\output\ModernHazard\_2019\_South\

Simulation Started: Mon Mar 11 12:00:43 2019

Simulation Finished: Mon Mar 11 12:16:33 2019

Simulation Time (min): 15.8

Simulation Settings:

Nr\_Source\_Points: 57

Nr\_Simulated\_Rocks: 20

Nr\_Random\_Orientations: 3

Nr\_Z-Offset\_Iterations: 1

(Nr\_Simulations\_Per\_Source\_Point: 60)

Total\_Nr\_Simulations: 3420

Simulation Results:

(Min/Mean/Max Values)

Jumpheights (m): 0.49 / 1.08 / 4.57

Velocities (m/s): 0.00 / 7.14 / 21.40

Kin. Energies (kJ): 0.00 / 353.04 / 10059.03

Rot. Velocities (rot s<sup>-1</sup>): 0.00 / 1.02 / 4.56

Average Slope (Degrees): -90.00 / 24.09 / 90.00

\*\*\*\*\*

Input Settings:

General:

Time Step (s): 0.010

Dump Step (s): 0.020

DEM File: PurauRockfall\PurauRockfall.xyz

DEM Resolution (m): 4.00

Calculation Domain: .\

Friction:

Overall Type: Medium

(Values have changed!)

Additional Friction Areas:

JWB\_Volcanic\_Rock\_2019.shp: Extra Hard

JWB\_Loess\_Volcanic\_Colluvium\_2019.shp: Medium Hard

JWB\_Valley\_Terrain\_2019.shp: Extra Soft

Release:

Type: Line

Line Shapefile: PurauRockfall\ModernHazard\_ReleaseLines\_South\_Final.shp

Z-Offset: 3.00 m

Rock:

Rock Density (kg/m<sup>3</sup>): 2700.00

Block Volumes (m3):

- Min = 1.13
- Mean = 6.27
- Max = 50.43

Rock Forms:

Real\_Equant\_1.25\_1.5m3.pts  
Real\_Equant\_1.25\_14.7m3.pts  
Real\_Equant\_1.25\_2.3m3.pts  
Real\_Equant\_1.2\_1.1m3.pts  
Real\_Equant\_1.2\_1.2m3(3000).pts  
Real\_Equant\_1.2\_1.3m3.pts  
Real\_Equant\_1.2\_1.4m3(3000).pts  
Real\_Equant\_1.2\_1.8m3.pts  
Real\_Equant\_1.2\_3.6m3.pts  
Real\_Equant\_1.4\_1.6m3(3000).pts  
Real\_Equant\_1.4\_1.7m3.pts  
Real\_Equant\_1.4\_1.9m3.pts  
Real\_Equant\_1.4\_2.0m3.pts  
Real\_Equant\_1.4\_4.8m3.pts  
Real\_Flat\_1.77\_50.4m3.pts  
Real\_Flat\_1.77\_6.0m3.pts  
Real\_Flat\_1.8\_2.6m3(3000).pts  
Real\_Long\_1.2\_2.9m3(3000).pts  
Real\_Long\_2.0\_17.8m3.pts  
Real\_Long\_2.0\_4.4m3(3000).pts

**S20. Rockfall simulation scenario logfile for RAMMS\_2\_Prehistoric\_No South\_10k uniform vegetation**

\*\*\*\*\*

RAMMS::ROCKFALL - Simulation Scenario Logfile

Version 1.6.61

Scenario Name: Prehistoric\_2019\_NoSouth\_10k\_Vegetation

Scenario Folder:

C:\RAMMS\PurauRockfall\output\Prehistoric\_2019\_NoSouth\_10k\_Vegetation\

Simulation Started: Tue Mar 12 14:35:06 2019

Simulation Finished: Tue Mar 12 17:52:59 2019

Simulation Time (min): 197.9

Simulation Settings:

Nr\_Source\_Points: 570

Nr\_Simulated\_Rocks: 20

Nr\_Random\_Orientations: 3

Nr\_Z-Offset\_Iterations: 1

(Nr\_Simulations\_Per\_Source\_Point: 60)

Total\_Nr\_Simulations: 34200

Simulation Results:

(Min/Mean/Max Values)

Jumpheights (m): 0.48 / 1.43 / 18.72

Velocities (m/s): 0.00 / 4.10 / 38.64

Kin. Energies (kJ): 0.00 / 687.52 / 103130.45

Rot. Velocities (rot s-1): 0.00 / 0.55 / 6.98

Average Slope (Degrees): 24.55 / 41.83 / 90.00

\*\*\*\*\*

Input Settings:

General:

Time Step (s): 0.010

Dump Step (s): 0.020

DEM File: PurauRockfall\PurauRockfall.xyz

DEM Resolution (m): 4.00

Calculation Domain: .\

Friction:

Overall Type: Medium

(Values have changed!)

Additional Friction Areas:

JWB\_Volcanic\_Rock\_2019.shp: Extra Hard

JWB\_Loess\_Volcanic\_Colluvium\_2019.shp: Medium Hard

JWB\_Valley\_Terrain\_2019.shp: Extra Soft

Forest/Moor:

ForestDense\_final.shp: Dense Forest (50 m2/ha)

ForestMedium\_final.shp: Medium Forest (35 m2/ha)

Release:

Type: Line  
Line Shapefile: PurauRockfall\Prehistoric\_ReleaseLines\_Final.shp  
Z-Offset: 10.00 m

Rock:

Rock Density (kg/m3): 2700.00

Block Volumes (m3):

- Min = 1.13
- Mean = 6.27
- Max = 50.43

Rock Forms:

Real\_Equant\_1.25\_1.5m3.pts  
Real\_Equant\_1.25\_14.7m3.pts  
Real\_Equant\_1.25\_2.3m3.pts  
Real\_Equant\_1.2\_1.1m3.pts  
Real\_Equant\_1.2\_1.2m3(3000).pts  
Real\_Equant\_1.2\_1.3m3.pts  
Real\_Equant\_1.2\_1.4m3(3000).pts  
Real\_Equant\_1.2\_1.8m3.pts  
Real\_Equant\_1.2\_3.6m3.pts  
Real\_Equant\_1.4\_1.6m3(3000).pts  
Real\_Equant\_1.4\_1.7m3.pts  
Real\_Equant\_1.4\_1.9m3.pts  
Real\_Equant\_1.4\_2.0m3.pts  
Real\_Equant\_1.4\_4.8m3.pts  
Real\_Flat\_1.77\_50.4m3.pts  
Real\_Flat\_1.77\_6.0m3.pts  
Real\_Flat\_1.8\_2.6m3(3000).pts  
Real\_Long\_1.2\_2.9m3(3000).pts  
Real\_Long\_2.0\_17.8m3.pts  
Real\_Long\_2.0\_4.4m3(3000).pts

**S21. Rockfall simulation scenario logfile for RAMMS\_2\_Prehistoric\_No South**

\*\*\*\*\*

RAMMS::ROCKFALL - Simulation Scenario Logfile

Version 1.6.61

Scenario Name: Prehistoric\_2019\_NoSouth

Scenario Folder: C:\RAMMS\PurauRockfall\output\Prehistoric\_2019\_NoSouth\

Simulation Started: Mon Mar 11 14:02:02 2019

Simulation Finished: Mon Mar 11 17:11:16 2019

Simulation Time (min): 189.2

Simulation Settings:

Nr\_Source\_Points: 570

Nr\_Simulated\_Rocks: 20

Nr\_Random\_Orientations: 3

Nr\_Z-Offset\_Iterations: 1

(Nr\_Simulations\_Per\_Source\_Point: 60)

Total\_Nr\_Simulations: 34200

Simulation Results:

(Min/Mean/Max Values)

Jumpheights (m): 0.48 / 1.46 / 16.71

Velocities (m/s): 0.00 / 5.71 / 39.65

Kin. Energies (kJ): 0.00 / 899.68 / 101926.38

Rot. Velocities (rot s-1): 0.00 / 0.77 / 6.80

Average Slope (Degrees): 23.84 / 38.79 / 90.00

\*\*\*\*\*

Input Settings:

General:

Time Step (s): 0.010

Dump Step (s): 0.020

DEM File: PurauRockfall\PurauRockfall.xyz

DEM Resolution (m): 4.00

Calculation Domain: .\

Friction:

Overall Type: Medium

(Values have changed!)

Additional Friction Areas:

JWB\_Volcanic\_Rock\_2019.shp: Extra Hard

JWB\_Loess\_Volcanic\_Colluvium\_2019.shp: Medium Hard

JWB\_Valley\_Terrain\_2019.shp: Extra Soft

Forest/Moor:

ForestDense\_final.shp: Dense Forest (50 m2/ha)

ForestMedium\_final.shp: Medium Forest (35 m2/ha)

Release:

Type: Line

Line Shapefile: PurauRockfall\Prehistoric\_ReleaseLines\_Final.shp  
Z-Offset: 10.00 m

Rock:

Rock Density (kg/m3): 2700.00

Block Volumes (m3):

- Min = 1.13
- Mean = 6.27
- Max = 50.43

Rock Forms:

Real\_Equant\_1.25\_1.5m3.pts  
Real\_Equant\_1.25\_14.7m3.pts  
Real\_Equant\_1.25\_2.3m3.pts  
Real\_Equant\_1.2\_1.1m3.pts  
Real\_Equant\_1.2\_1.2m3(3000).pts  
Real\_Equant\_1.2\_1.3m3.pts  
Real\_Equant\_1.2\_1.4m3(3000).pts  
Real\_Equant\_1.2\_1.8m3.pts  
Real\_Equant\_1.2\_3.6m3.pts  
Real\_Equant\_1.4\_1.6m3(3000).pts  
Real\_Equant\_1.4\_1.7m3.pts  
Real\_Equant\_1.4\_1.9m3.pts  
Real\_Equant\_1.4\_2.0m3.pts  
Real\_Equant\_1.4\_4.8m3.pts  
Real\_Flat\_1.77\_50.4m3.pts  
Real\_Flat\_1.77\_6.0m3.pts  
Real\_Flat\_1.8\_2.6m3(3000).pts  
Real\_Long\_1.2\_2.9m3(3000).pts  
Real\_Long\_2.0\_17.8m3.pts  
Real\_Long\_2.0\_4.4m3(3000).pts

**S22. Rockfall simulation scenario logfile for RAMMS\_2\_Prehistoric\_South\_10k uniform vegetation**

\*\*\*\*\*

RAMMS::ROCKFALL - Simulation Scenario Logfile

Version 1.6.61

Scenario Name: Prehistoric\_2019\_South\_10k\_Vegetation

Scenario Folder:

C:\RAMMS\PurauRockfall\output\Prehistoric\_2019\_South\_10k\_Vegetation\

Simulation Started: Mon Mar 11 13:12:34 2019

Simulation Finished: Mon Mar 11 13:30:48 2019

Simulation Time (min): 18.2

Simulation Settings:

Nr\_Source\_Points: 57

Nr\_Simulated\_Rocks: 20

Nr\_Random\_Orientations: 3

Nr\_Z-Offset\_Iterations: 1

(Nr\_Simulations\_Per\_Source\_Point: 60)

Total\_Nr\_Simulations: 3420

Simulation Results:

(Min/Mean/Max Values)

Jumpheights (m): 0.50 / 1.16 / 3.84

Velocities (m/s): 0.00 / 1.88 / 10.39

Kin. Energies (kJ): 0.00 / 95.20 / 2762.00

Rot. Velocities (rot s-1): 0.00 / 0.26 / 1.31

Average Slope (Degrees): -90.00 / 41.50 / 90.00

\*\*\*\*\*

Input Settings:

General:

Time Step (s): 0.010

Dump Step (s): 0.020

DEM File: PurauRockfall\PurauRockfall.xyz

DEM Resolution (m): 4.00

Calculation Domain: .\

Friction:

Overall Type: Medium

(Values have changed!)

Additional Friction Areas:

JWB\_Volcanic\_Rock\_2019.shp: Extra Hard

JWB\_Loess\_Volcanic\_Colluvium\_2019.shp: Medium Hard

JWB\_Valley\_Terrain\_2019.shp: Extra Soft

Forest/Moor:

ForestDense\_final.shp: Dense Forest (50 m2/ha)

ForestMedium\_final.shp: Dense Forest (50 m2/ha)

Release:

Type: Line  
Line Shapefile: PurauRockfall\Prehistoric\_SouthReleaseLines\_Final.shp  
Z-Offset: 3.00 m

Rock:

Rock Density (kg/m3): 2700.00

Block Volumes (m3):

- Min = 1.13
- Mean = 6.27
- Max = 50.43

Rock Forms:

Real\_Equant\_1.25\_1.5m3.pts  
Real\_Equant\_1.25\_14.7m3.pts  
Real\_Equant\_1.25\_2.3m3.pts  
Real\_Equant\_1.2\_1.1m3.pts  
Real\_Equant\_1.2\_1.2m3(3000).pts  
Real\_Equant\_1.2\_1.3m3.pts  
Real\_Equant\_1.2\_1.4m3(3000).pts  
Real\_Equant\_1.2\_1.8m3.pts  
Real\_Equant\_1.2\_3.6m3.pts  
Real\_Equant\_1.4\_1.6m3(3000).pts  
Real\_Equant\_1.4\_1.7m3.pts  
Real\_Equant\_1.4\_1.9m3.pts  
Real\_Equant\_1.4\_2.0m3.pts  
Real\_Equant\_1.4\_4.8m3.pts  
Real\_Flat\_1.77\_50.4m3.pts  
Real\_Flat\_1.77\_6.0m3.pts  
Real\_Flat\_1.8\_2.6m3(3000).pts  
Real\_Long\_1.2\_2.9m3(3000).pts  
Real\_Long\_2.0\_17.8m3.pts  
Real\_Long\_2.0\_4.4m3(3000).pts

**S23. Rockfall simulation scenario logfile for RAMMS\_2\_Prehistoric\_South**

\*\*\*\*\*

RAMMS::ROCKFALL - Simulation Scenario Logfile

Version 1.6.61

Scenario Name: Prehistoric\_2019\_South

Scenario Folder: C:\RAMMS\PurauRockfall\output\Prehistoric\_2019\_South\

Simulation Started: Mon Mar 11 12:49:45 2019

Simulation Finished: Mon Mar 11 13:08:18 2019

Simulation Time (min): 18.6

Simulation Settings:

Nr\_Source\_Points: 57

Nr\_Simulated\_Rocks: 20

Nr\_Random\_Orientations: 3

Nr\_Z-Offset\_Iterations: 1

(Nr\_Simulations\_Per\_Source\_Point: 60)

Total\_Nr\_Simulations: 3420

Simulation Results:

(Min/Mean/Max Values)

Jumpheights (m): 0.42 / 1.06 / 3.87

Velocities (m/s): 0.00 / 2.62 / 13.91

Kin. Energies (kJ): 0.00 / 138.86 / 4493.12

Rot. Velocities (rot s-1): 0.00 / 0.39 / 1.55

Average Slope (Degrees): 2.99 / 28.65 / 90.00

\*\*\*\*\*

Input Settings:

General:

Time Step (s): 0.010

Dump Step (s): 0.020

DEM File: PurauRockfall\PurauRockfall.xyz

DEM Resolution (m): 4.00

Calculation Domain: .\

Friction:

Overall Type: Medium

(Values have changed!)

Additional Friction Areas:

JWB\_Volcanic\_Rock\_2019.shp: Extra Hard

JWB\_Loess\_Volcanic\_Colluvium\_2019.shp: Medium Hard

JWB\_Valley\_Terrain\_2019.shp: Extra Soft

Forest/Moor:

ForestDense\_final.shp: Dense Forest (50 m2/ha)

ForestMedium\_final.shp: Medium Forest (35 m2/ha)

Release:

Type: Line

Line Shapefile: PurauRockfall\Prehistoric\_SouthReleaseLines\_Final.shp

Z-Offset: 3.00 m

Rock:

Rock Density (kg/m3): 2700.00

Block Volumes (m3):

- Min = 1.13
- Mean = 6.27
- Max = 50.43

Rock Forms:

Real\_Equant\_1.25\_1.5m3.pts  
Real\_Equant\_1.25\_14.7m3.pts  
Real\_Equant\_1.25\_2.3m3.pts  
Real\_Equant\_1.2\_1.1m3.pts  
Real\_Equant\_1.2\_1.2m3(3000).pts  
Real\_Equant\_1.2\_1.3m3.pts  
Real\_Equant\_1.2\_1.4m3(3000).pts  
Real\_Equant\_1.2\_1.8m3.pts  
Real\_Equant\_1.2\_3.6m3.pts  
Real\_Equant\_1.4\_1.6m3(3000).pts  
Real\_Equant\_1.4\_1.7m3.pts  
Real\_Equant\_1.4\_1.9m3.pts  
Real\_Equant\_1.4\_2.0m3.pts  
Real\_Equant\_1.4\_4.8m3.pts  
Real\_Flat\_1.77\_50.4m3.pts  
Real\_Flat\_1.77\_6.0m3.pts  
Real\_Flat\_1.8\_2.6m3(3000).pts  
Real\_Long\_1.2\_2.9m3(3000).pts  
Real\_Long\_2.0\_17.8m3.pts  
Real\_Long\_2.0\_4.4m3(3000).pts

## **S24 Purau Rockfall Runout – Data Fit Results**

### **CES D1 Polynomial**

$$\text{Equation } Y = -5.352366643 + 0.5828450158 * X - 0.0005711632991 * \text{pow}(X,2)$$

Degree = 2

Number of data points used = 30

Average X = 119.626

Average Y = 47.7263

Coefficients:

Degree 0 = -5.352366643

Degree 1 = 0.5828450158

Degree 2 = -0.0005711632991

Degree: 0

Residual sum of squares = 71031.6

Coef of determination, R-squared = 0

Degree: 1

Residual sum of squares = 1225.85

Coef of determination, R-squared = 0.982742

Degree: 2

Residual sum of squares = 331.456

Coef of determination, R-squared = 0.995334

### **Pre-CES D1 Linear**

$$\text{Equation } Y = 0.4137619746 * X + 7.802815954$$

Number of data points used = 17

Average X = 29.8612

Average Y = 20.1582

Residual sum of squares = 288.534

Regression sum of squares = 2483.05

Coef of determination, R-squared = 0.895896

Residual mean square, sigma-hat-sq'd = 19.2356

### **CES D2 Linear**

$$\text{Equation } Y = 0.7229916898 * X + 3.597202216$$

Number of data points used = 2

Average X = 14.105

Average Y = 13.795

Residual sum of squares = 0

Regression sum of squares = 3.40605  
Coef of determination, R-squared = 1  
Residual mean square, sigma-hat-sq'd = 0

### **Pre-CES D2 Linear**

Equation  $Y = 0.4826062189 * X + 11.73054364$   
Number of data points used = 39  
Average X = 84.0121  
Average Y = 52.2753  
Residual sum of squares = 488.349  
Regression sum of squares = 39016.4  
Coef of determination, R-squared = 0.987638  
Residual mean square, sigma-hat-sq'd = 13.1986

### **CES D3 Log**

Equation  $Y = 112.0567131 * \ln(X) - 402.7873441$   
Number of data points used = 41  
Average  $\ln(X)$  = 5.43171  
Average Y = 205.872  
Residual sum of squares = 568.485  
Regression sum of squares = 37982.9  
Coef of determination, R-squared = 0.985254  
Residual mean square, sigma-hat-sq'd = 14.5765

### **Pre-CES D3 Log**

Equation  $Y = 112.0310699 * \ln(X) - 404.957145$   
Number of data points used = 97  
Average  $\ln(X)$  = 5.43007  
Average Y = 203.379  
Residual sum of squares = 2083.81  
Regression sum of squares = 120505  
Coef of determination, R-squared = 0.983002  
Residual mean square, sigma-hat-sq'd = 21.9349

### **CES D4 Linear**

Equation  $Y = 0.4222533788 * X + 39.52552325$   
Number of data points used = 36  
Average X = 181.752  
Average Y = 116.271  
Residual sum of squares = 510.625  
Regression sum of squares = 23377.1  
Coef of determination, R-squared = 0.978624

Residual mean square,  $\sigma^2_{\text{d}}$  = 15.0184

**Pre-CES D4 Linear**

Equation  $Y = 0.4401373207 * X + 34.8872446$

Number of data points used = 9

Average X = 109.11

Average Y = 82.9106

Residual sum of squares = 183.023

Regression sum of squares = 5282.47

Coef of determination,  $R^2$  = 0.966513

Residual mean square,  $\sigma^2_{\text{d}}$  = 26.1461
